# Supplementary material
Source: ML conference proceedings conference paper supplement (https://openaccess.thecvf.com/content/ICCV2025/html/Yu_Heavy_Labels_Out_ICCV_2025_paper.html)
Supplement: Supplementary file 1 [file 07913_supp.pdf › 07913_supp/07913_supp.pdf]

# Heavy Labels Out! Dataset Distillation with Label Space Lightening

## Supplementary Material

### A. Implementation Details

#### A.1. Datasets

We primarily conduct experiments on high-resolution datasets ImageNet-100, Places365-Standard [15], and ImageNet-1K [2]. Among them, ImageNet-100 is a subset of ImageNet-1K. As there are multiple versions of ImageNet-100, we follow the previous work IDC [4] to build the dataset. In addition, all images are resized to  $224 \times 224$ .

#### A.2. Networks

Our proposed method utilizes ResNet-18 [3] networks in different training stages as guidance to perform LoRA-like low-rank knowledge transfer to the surrogate projection model. Here, we adopt the official torchvision code to obtain the training trajectories of the teacher models for ImageNet-100, Places365-Standard, and ImageNet-1K. For detailed parameter settings, please refer to Table 1. To better align with downstream tasks, we propose a multi-weak-teacher strategy. The stage of the model is closely related to the complexity of the dataset. For simple dataset or small IPC, we adopt teachers from the very early stage, while for complex or large IPC, we adopt teachers from the later stage.

For baseline performance evaluation, we adopt ResNet-18 [3] as the evaluation architecture. For cross-architecture performance evaluation, we adopt ShuffleNet-V2 (X0\_5) [6], MobileNet-V2 [8], EfficientNet-B0 [12], Swin-V2-Tiny [5], and VGG-11 [10] as the evaluation architectures.

#### A.3. Details of Surrogate Projection

For the architecture of the surrogate projection models, we adopt CLIP (ResNet-50) [7] from the Open-AI as the base model. Here, we use the image encoder part from CLIP, followed by a  $1024 \times C$  linear transformation.

To improve the initial performance of the whole projection model and save storage space, we employ the text embedding of the text encoder to initialize the linear transformation. We adopt prompts from the official prompt engineering to ensemble generate text embedding, which is as follows: “*itap of a {}.*”; “*a bad photo of the {}.*”; “*a origami {}.*”; “*a photo of the large {}.*”; “*a {} in a video game.*”; “*art of the {}.*”; “*a photo of the small {}.*”. Also, the computational process of the projection model is equivalent with the original CLIP model. Subsequent updates of the whole projection model will be carried out through LoRA-

like low-rank knowledge transfer, which significantly reduce the required storage.

| Hypeparameter           | Value |
|-------------------------|-------|
| Optimizer               | SGD   |
| Base Learning Rate      | 0.1   |
| Learning Rate Scheduler | Step  |
| Weight Decay            | 1e-4  |
| Learning Rate Step Size | 30    |
| Momentum                | 0.9   |
| Batch Size              | 256   |
| Model Pool Size         | 9     |
| Training Epochs         | 90    |

Table 1. The hyper-parameters of teacher model generation for all three datasets.

| Hypeparameter   | Value    |
|-----------------|----------|
| Optimizer       | AdamW    |
| Learning Rate   | 5e-4     |
| Training Epochs | 20       |
| Loss Type       | MSE + CE |
| CE Weight       | 0.1      |
| Batch Size      | 256      |

Table 2. The hyper-parameters of LoRA-like knowledge transfer for all three datasets.

| Hypeparameter   | Value    |
|-----------------|----------|
| Optimizer       | AdamW    |
| Learning Rate   | 1e-3     |
| Training Epochs | 300      |
| Loss Type       | MSE + CE |
| CE Weight       | 0.025    |
| Batch Size      | 100      |
| Augmentation    | CutMix   |
| Alpha           | 1.0      |

Table 3. The hyper-parameters of evaluation for all three datasets.

#### A.4. Details of LoRA-Like Low-Rank Knowledge Transfer

Here, for the ImageNet-100 dataset, we adopt rank 8 and 64 for the image encoder part and linear transformation part, respectively. As for both Places365-Standard and ImageNet-1K, we adopt rank 8 and 128 for the image encoder part and linear transformation part, respectively. At the same time, we adopt multiple weak teachers to guide the projector learning. The hyper-parameters of the knowledge transfer process are listed in Table 2.

#### A.5. Details of Image Initialization and Update

For image initialization, we adopt the state-of-the-art method RDED [11] to select and concatenate the important patches from the original dataset by well-pretrained ResNet-18. Then, to narrow the performance gap between the observer and the projector, we follow the LIC [1], and adapt it to our cases. We match the information loss of the features encoded by the image encoder of the projector. Here, the learning rate of the image update is 0.01, the optimizer is Adam, and the number of epochs is 300.

#### A.6. Details of Evaluation

For all three datasets, the number of training epochs for evaluation is 300. Following the previous works [9, 11, 13], the augmentation strategy used here is CutMix [14]. For more details, please refer to Table 3.

### B. More Experiments Results

#### B.1. Results on Higher IPCs

To further show the effectiveness of our proposed method, here, we conduct experiments under the settings of ImageNet-100 with IPC 100. The performance results and the required extra storage costs are shown in Table 4 (here, we adopt online soft label generation and regard the teacher model as the extra storage costs). The results indicate that our proposed method can maintain high performance at higher IPCs.

|             | Downstream Accuracy              | Extra Storage                          |
|-------------|----------------------------------|----------------------------------------|
| <b>RDED</b> | $75.9 \pm 0.1$                   | 42.8MB                                 |
| <b>Ours</b> | <b><math>76.2 \pm 0.2</math></b> | <b>10.2MB (0.2<math>\times</math>)</b> |

Table 4. The results on higher IPCs. The experiments are conducted under the ImageNet-100 with IPC 100. Here, the required extra storage costs for RDED is the storage costs for teacher model.

|             | ViT-B-16                                | Swin-V2-Tiny                             |
|-------------|-----------------------------------------|------------------------------------------|
| <b>RDED</b> | $19.1 \pm 0.4$                          | $17.8 \pm 0.1$                           |
| <b>Ours</b> | <b><math>23.3 \pm 0.3 (+4.2)</math></b> | <b><math>29.5 \pm 0.1 (+11.7)</math></b> |

Table 5. The cross-architecture results on transformer-based architectures. The experiments are conducted under the setting of ImageNet-1K with IPC 10.

|                    | Ours    | SRe <sup>2</sup> L | G.VBSM   | RDED    |
|--------------------|---------|--------------------|----------|---------|
| <b>Runtime</b>     | 0.21s   | 0.75s              | 0.77s    | 0.12s   |
| <b>Peak Memory</b> | 4004MiB | 20850MiB           | 23310MiB | 4538MiB |

Table 6. The comparison for the efficiency of the downstream training. Here, we evaluate the required runtime for single iteration and over all peak memory.

#### B.2. Results on More Transformer-Based Architectures

To demonstrate the generalizability of our proposed method on transformer-based architectures, we conduct cross-architecture evaluation experiments on Swin-V2-Tiny under the ImageNet-1K setting with IPC 10, as presented in the paper. In addition, we perform supplementary experiments on ViT-B-16 under the same settings, with the results shown in Table 5. The evaluation results indicate that our proposed method exhibits stronger generalization ability on transformer-based models.

#### B.3. Efficiency Evaluation for Downstream Tasks

Here, we conduct experiments under the ImageNet-1K with IPC 10 setting. All methods are evaluated based on the official code, and all experimental configurations, including hyperparameters, are set according to the official default values provided by the authors. Specifically, we measure the time required for each single downstream training iteration as well as the overall memory cost. All experiments are conducted on one single NVIDIA RTX A5000 GPU.

#### B.4. Results on Other Tasks

We also conduct experiments on semantic segmentation tasks, here we follow the definition and setting of dataset distillation, utilizing a very small subset of 10,000 images from the SA-1B dataset (around 0.09% of the original dataset) for downstream model training. Here, the baseline performance is evaluated on the 89.85M SAM-B model (storage costs 358.32MB) to generate soft labels for the downstream tasks. Our proposed method adopts the SAM-B model as the base model and applies our proposed label space lightening strategies, finally with only 5.64M (storage costs 22.56MB, 6.3% of the original storage costs) learn-

|                              | Downstream mIoU | Extra Storage           |
|------------------------------|-----------------|-------------------------|
| <b>SAM-B Directly Guided</b> | 49.46%          | 358.32MB                |
| <b>Ours</b>                  | <b>50.75%</b>   | <b>22.56MB (0.063×)</b> |

Table 7. Performance on semantic segmentation tasks. Here, SAM-B Directly Guided refers to directly adopting the SAM-B model to generate the soft labels for downstream tasks. Our method utilizes SAM-B as the base model with only 6.3% of the original costs to achieve better performance.

able and required to store parameters. The baseline performance is mIoU 49.46%, while our proposed method, uses only 6.3% storage costs, and achieves better performance with mIoU of 50.75%.

## References

- [1] Anonymous. Information compensation: A fix for any-scale dataset distillation. In *ICLR 2024 Workshop on Data-centric Machine Learning Research (DMLR): Harnessing Momentum for Science*, 2024. 2
- [2] Jia Deng, Wei Dong, Richard Socher, Li-Jia Li, Kai Li, and Li Fei-Fei. Imagenet: A large-scale hierarchical image database. In *2009 IEEE conference on computer vision and pattern recognition*, pages 248–255. Ieee, 2009. 1
- [3] Kaiming He, Xiangyu Zhang, Shaoqing Ren, and Jian Sun. Deep residual learning for image recognition. In *Proceedings of the IEEE conference on computer vision and pattern recognition*, pages 770–778, 2016. 1
- [4] Jang-Hyun Kim, Jinuk Kim, Seong Joon Oh, Sangdoo Yun, Hwanjun Song, Joonhyun Jeong, Jung-Woo Ha, and Hyun Oh Song. Dataset condensation via efficient synthetic-data parameterization. In *International Conference on Machine Learning*, pages 11102–11118. PMLR, 2022. 1
- [5] Ze Liu, Han Hu, Yutong Lin, Zhuliang Yao, Zhenda Xie, Yixuan Wei, Jia Ning, Yue Cao, Zheng Zhang, Li Dong, et al. Swin transformer v2: Scaling up capacity and resolution. In *Proceedings of the IEEE/CVF conference on computer vision and pattern recognition*, pages 12009–12019, 2022. 1
- [6] Ningning Ma, Xiangyu Zhang, Hai-Tao Zheng, and Jian Sun. Shufflenet v2: Practical guidelines for efficient cnn architecture design. In *Proceedings of the European conference on computer vision (ECCV)*, pages 116–131, 2018. 1
- [7] Alec Radford, Jong Wook Kim, Chris Hallacy, Aditya Ramesh, Gabriel Goh, Sandhini Agarwal, Girish Sastry, Amanda Askell, Pamela Mishkin, Jack Clark, et al. Learning transferable visual models from natural language supervision. In *International conference on machine learning*, pages 8748–8763. PMLR, 2021. 1
- [8] Mark Sandler, Andrew Howard, Menglong Zhu, Andrey Zhmoginov, and Liang-Chieh Chen. Mobilenetv2: Inverted residuals and linear bottlenecks. In *Proceedings of the IEEE conference on computer vision and pattern recognition*, pages 4510–4520, 2018. 1
- [9] Shitong Shao, Zeyuan Yin, Muxin Zhou, Xindong Zhang, and Zhiqiang Shen. Generalized large-scale data condensation via various backbone and statistical matching. In *Proceedings of the IEEE/CVF Conference on Computer Vision and Pattern Recognition*, pages 16709–16718, 2024. 2
- [10] Karen Simonyan. Very deep convolutional networks for large-scale image recognition. *arXiv preprint arXiv:1409.1556*, 2014. 1
- [11] Peng Sun, Bei Shi, Daiwei Yu, and Tao Lin. On the diversity and realism of distilled dataset: An efficient dataset distillation paradigm. In *Proceedings of the IEEE/CVF Conference on Computer Vision and Pattern Recognition*, pages 9390–9399, 2024. 2
- [12] Mingxing Tan and Quoc Le. Efficientnet: Rethinking model scaling for convolutional neural networks. In *International conference on machine learning*, pages 6105–6114. PMLR, 2019. 1
- [13] Zeyuan Yin, Eric Xing, and Zhiqiang Shen. Squeeze, recover and relabel: Dataset condensation at imagenet scale from a new perspective. *Advances in Neural Information Processing Systems*, 36, 2024. 2
- [14] Sangdoo Yun, Dongyoon Han, Seong Joon Oh, Sanghyuk Chun, Junsuk Choe, and Youngjoon Yoo. Cutmix: Regularization strategy to train strong classifiers with localizable features. In *Proceedings of the IEEE/CVF international conference on computer vision*, pages 6023–6032, 2019. 2
- [15] Bolei Zhou, Agata Lapedriza, Aditya Khosla, Aude Oliva, and Antonio Torralba. Places: A 10 million image database for scene recognition. *IEEE transactions on pattern analysis and machine intelligence*, 40(6):1452–1464, 2017. 1
